# Supplementary material for: Design of screen-printed potentiometric platform for sensitive determination of mirabegron in spiked human plasma; molecular docking and transducer optimization
Source: Royal Society of Chemistry journal article supplement (doi:10.1039/d3ra02343e), 2023-01-01
Supplement: d3ra02343e4.pdf [file d3ra02343e4.pdf]

## **Design of Screen-Printed Potentiometric Platform for Sensitive Determination of Mirabegron in Spiked Human Plasma; molecular docking and transducer optimization**

**Aya A. Mouhamed<sup>a</sup>, Basma M. Eltanany<sup>a</sup>, Nadia M. Mostafa<sup>a</sup>, Tamer A. Elwaie<sup>b,c</sup>, Ahmed H. Nadim<sup>a\*</sup>**

<sup>a</sup> Department of Analytical Chemistry, Faculty of Pharmacy, Cairo University, Cairo 11562, Egypt.

<sup>b</sup> Department of Pharmaceutical Chemistry, Faculty of Pharmacy, Cairo University, Cairo 11562, Egypt.

<sup>c</sup> Department of Pharmaceutical Sciences, Irma Lerma Rangel College of Pharmacy, Texas A&M Health Science Centre School of Pharmacy, Texas 78363, United States.

### **\*Correspondence:**

Ahmed H. Nadim,

Faculty of Pharmacy - Cairo University

Kasr El-Aini St., Cairo 11562, Egypt

[ahmed.nagib@pharma.cu.edu.eg](mailto:ahmed.nagib@pharma.cu.edu.eg)

### Supplementary Information

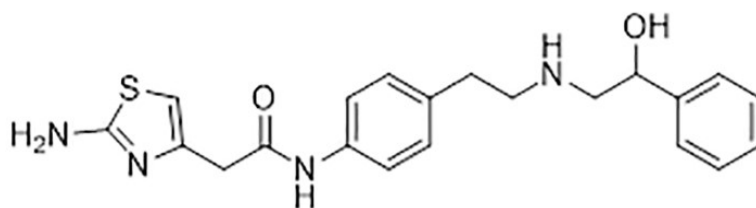

**Fig. S1:** Chemical structure of mirabegron.

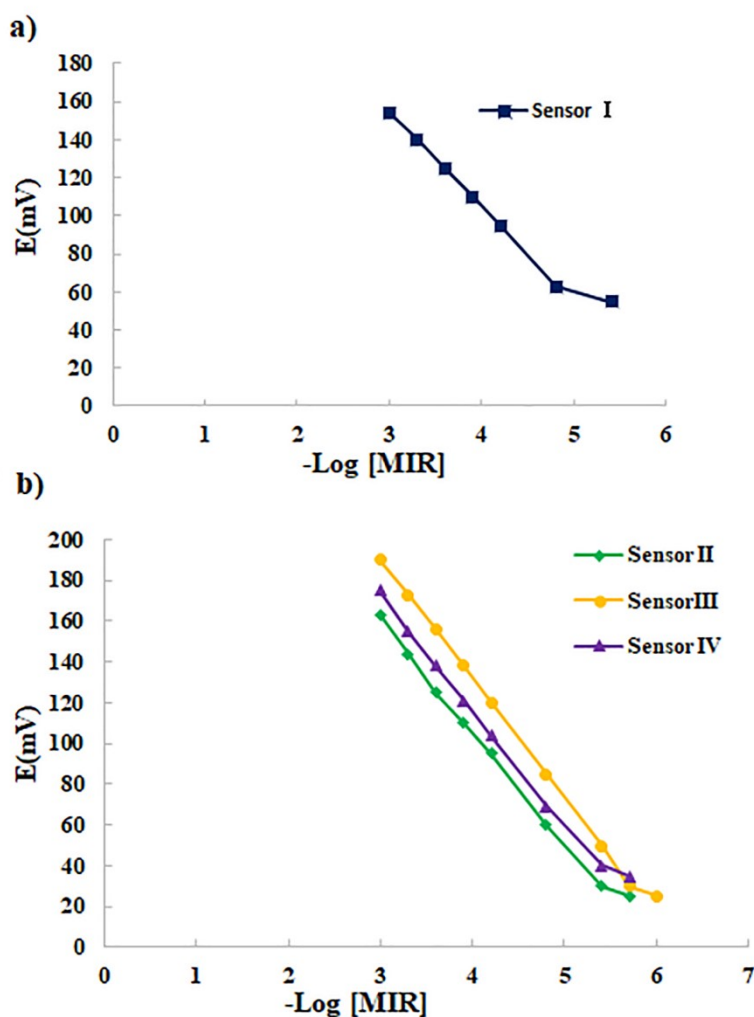

**Fig. S2:(a)** Profile of the potential in mV/- Log MIR molar concentration using Liquid membrane sensor I [ $1.56 \times 10^{-5}$  M -  $1 \times 10^{-3}$  M]. **(b)** Profile of the potential in mV/- Log MIR molar concentration using sensor II, sensor III [ $3.91 \times 10^{-6}$  M -  $1 \times 10^{-3}$  M], and sensor IV [ $1.9 \times 10^{-6}$  M -  $1 \times 10^{-3}$  M].
