# Supplementary figures and images for: Design of screen-printed potentiometric platform for sensitive determination of mirabegron in spiked human plasma; molecular docking and transducer optimization
Source: Royal Society of Chemistry journal article supplement (doi:10.1039/d3ra02343e), 2023-01-01

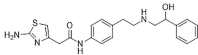

Supplement: d3ra02343e2.pdf [file d3ra02343e2.pdf]

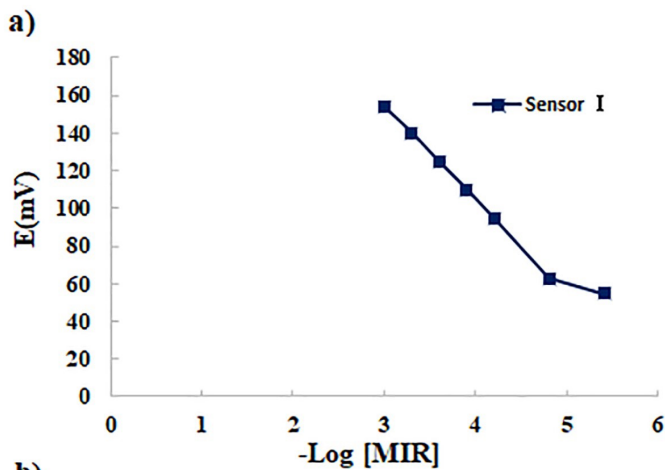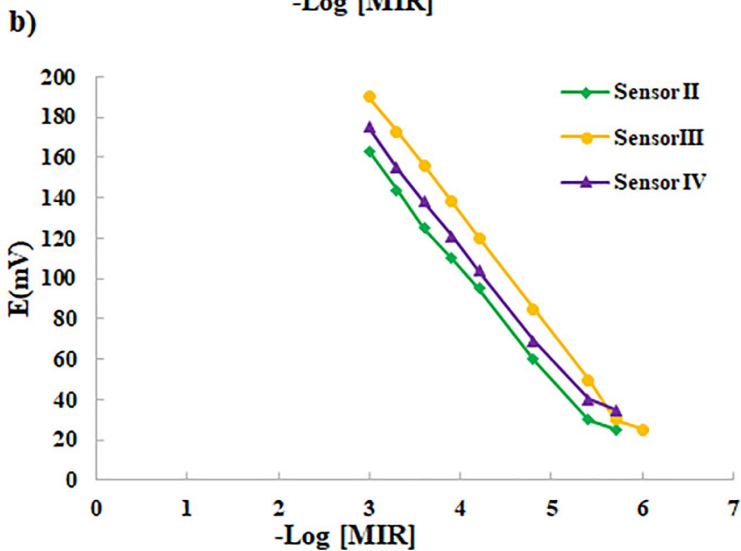

Supplement: d3ra02343e3.pdf [file d3ra02343e3.pdf]
